# Supplementary material
Source: Springer Nature journal article supplement (https://www.springermedizin.de/resource/supplementary/12891_2006_226_MOESM3_ESM.pdf/9510792)

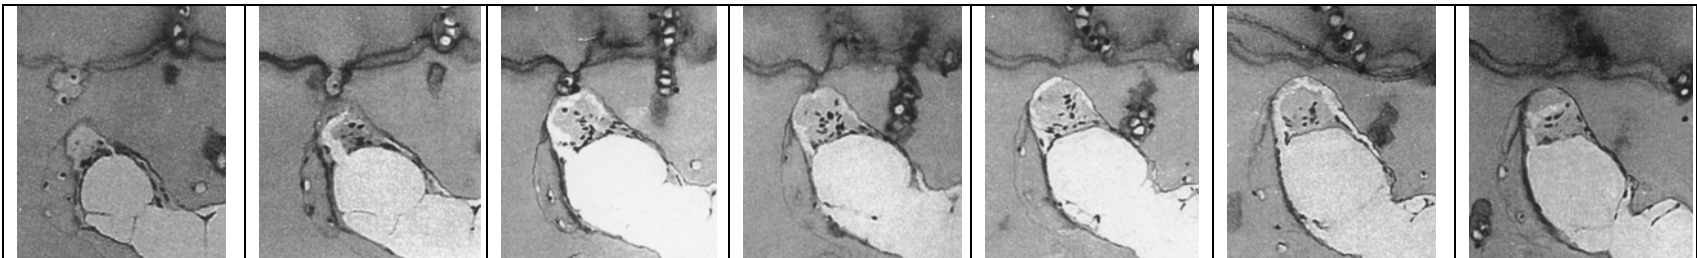

a b c d e f g

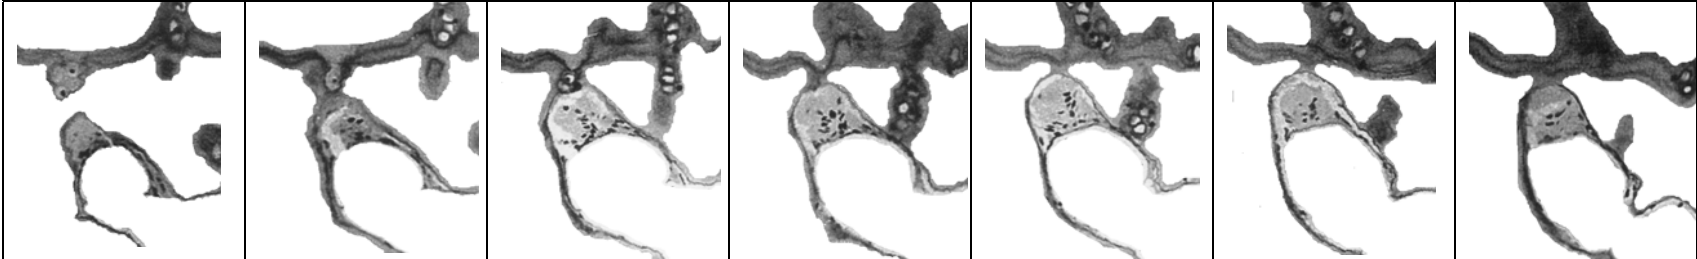

Supplement: MOESM3 [file 9510792]
